# Supplementary material
Source: HighWire-hosted journal article supplement (https://bmjopen.bmj.com/content/12/7/e062623)

**eFigure 1.** The annual number of observations for coagulation biomarkers, by individual biomarkers. Data are from the Central Denmark Region, 2011-2021. Note that the y-axis (number of observations) is different across the panels, reflecting how often the biomarkers are used in routine clinical settings.

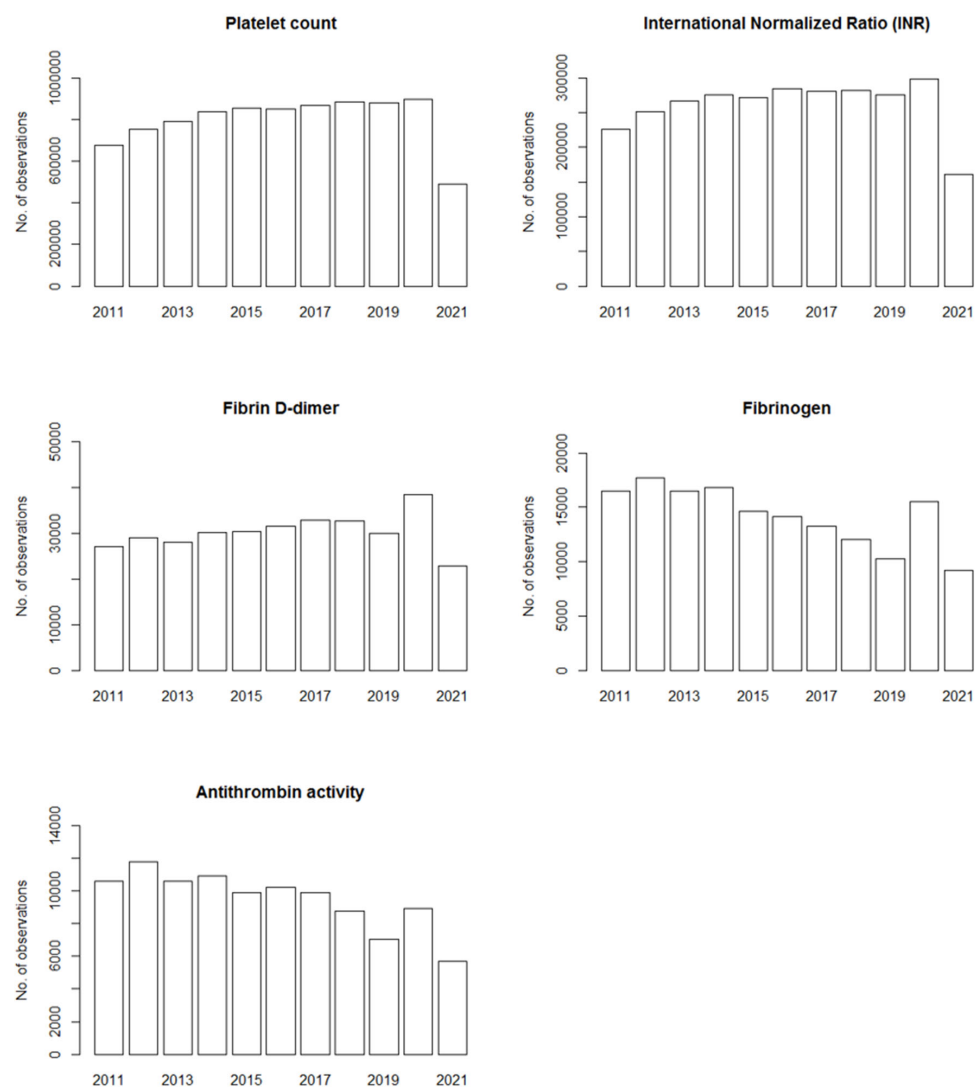

**eFigure 2.** Annual median level of the coagulation biomarkers. Data are from the Central Denmark Region, 2011-2021.

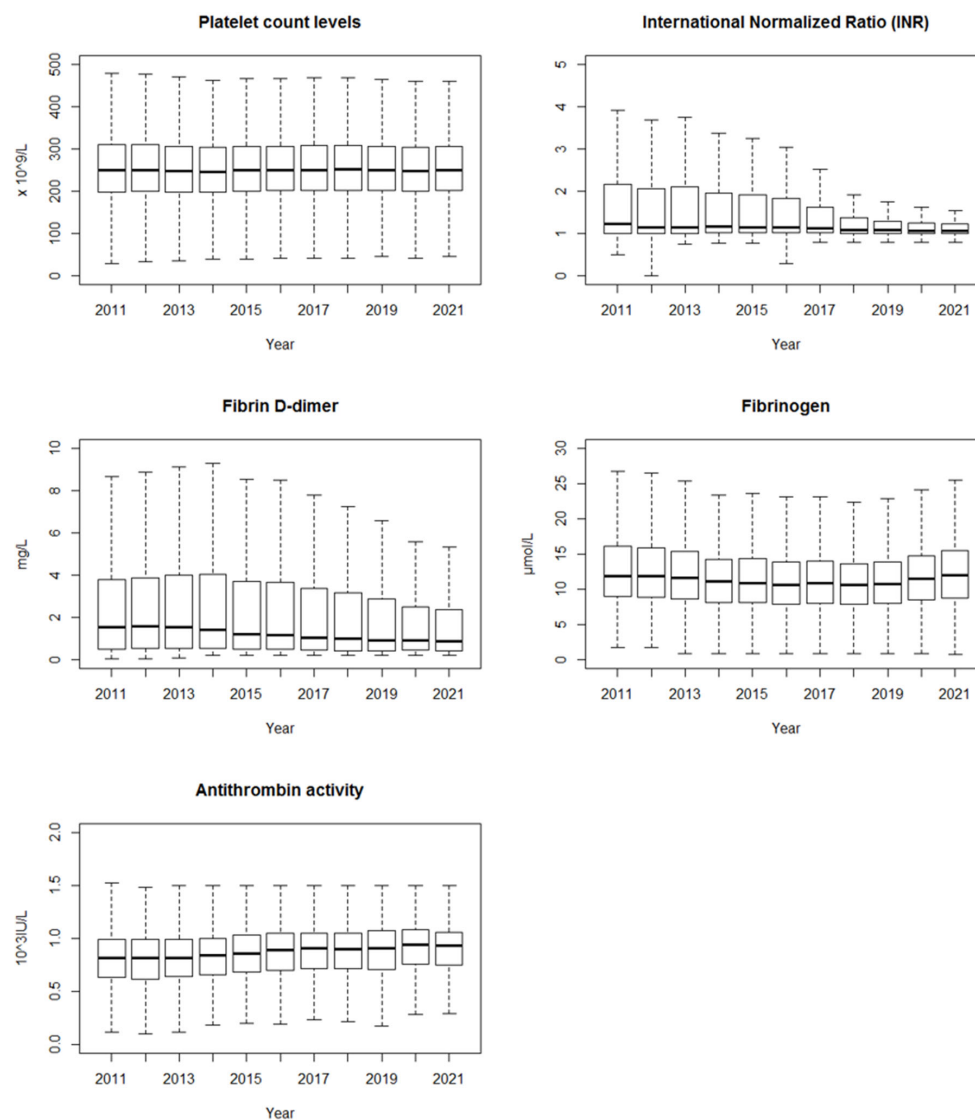

Supplement: inline-supplementary-material-3 [file inline-supplementary-material-3.pdf]
